# Supplementary material
Source: PubMed Central journal article supplement (PMC3500537)
Supplement: supp_112.197590_JPET197590_Supplementary_Figures.pdf [file supp_112.197590_JPET197590_Supplementary_Figures.pdf]

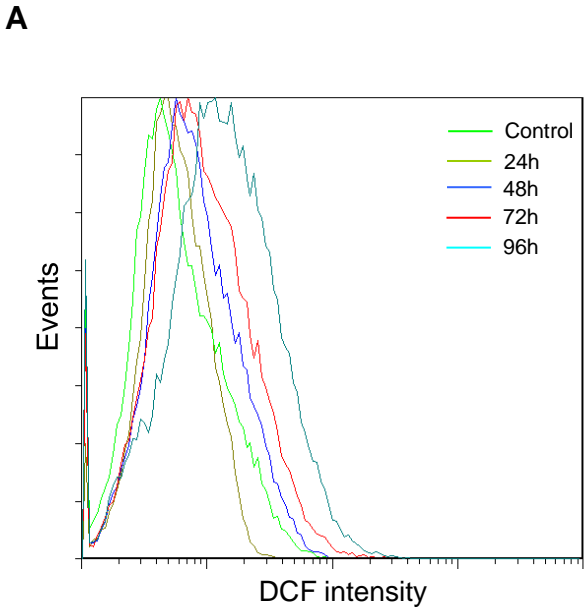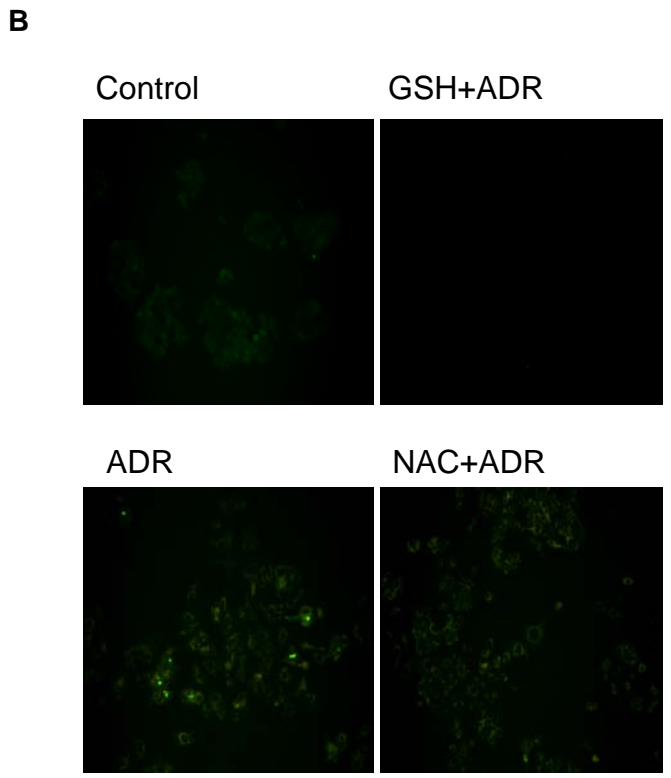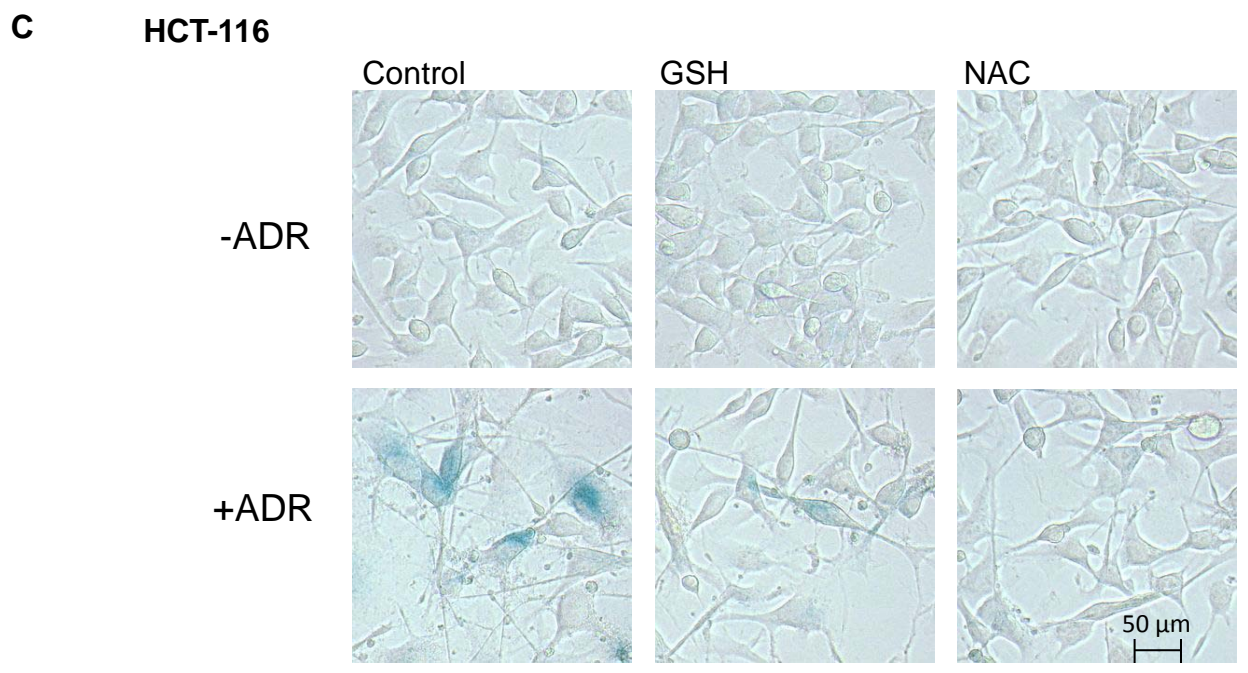

D

HCT-116

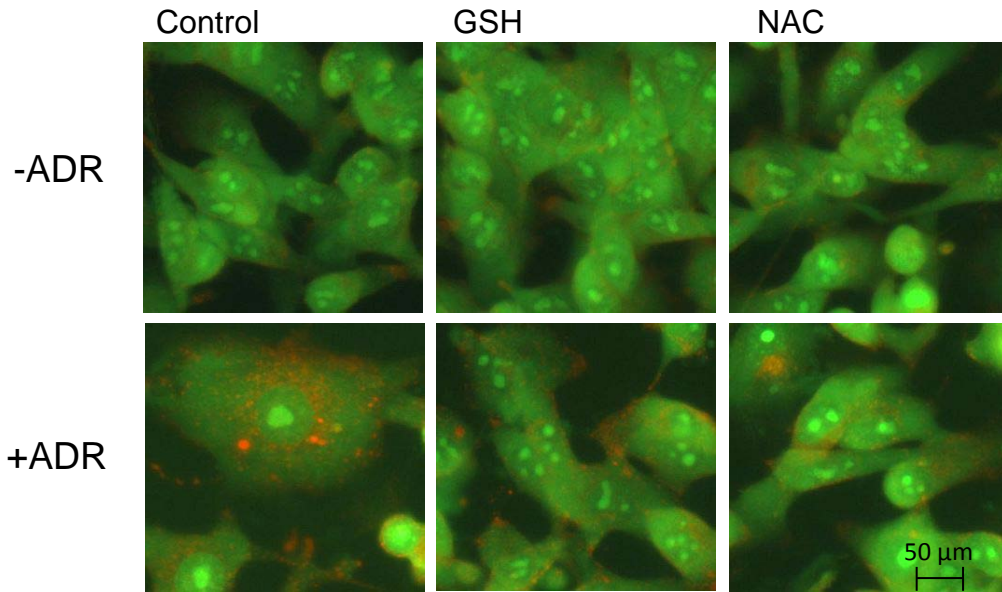

**JPET 197590 Goehe et al. The autophagy-senescence connection in chemotherapy; must tumor cells (self) eat before they sleep?  
Supplementary Figure 1**

**A**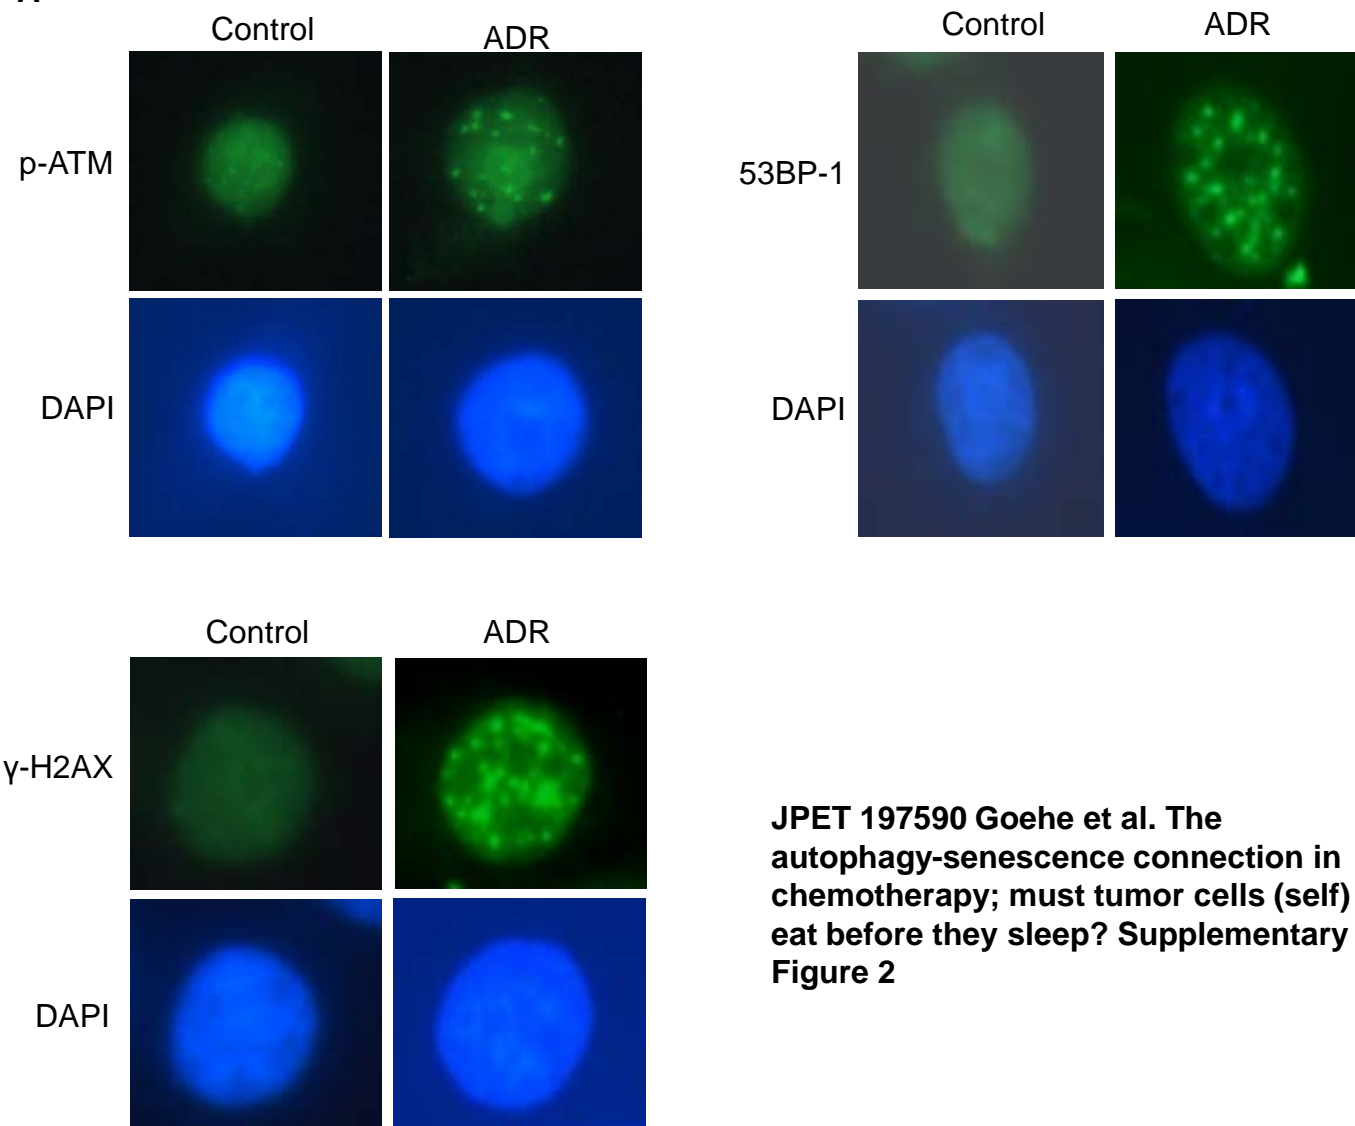

**JPET 197590 Goehe et al. The autophagy-senescence connection in chemotherapy; must tumor cells (self) eat before they sleep? Supplementary Figure 2**

**B**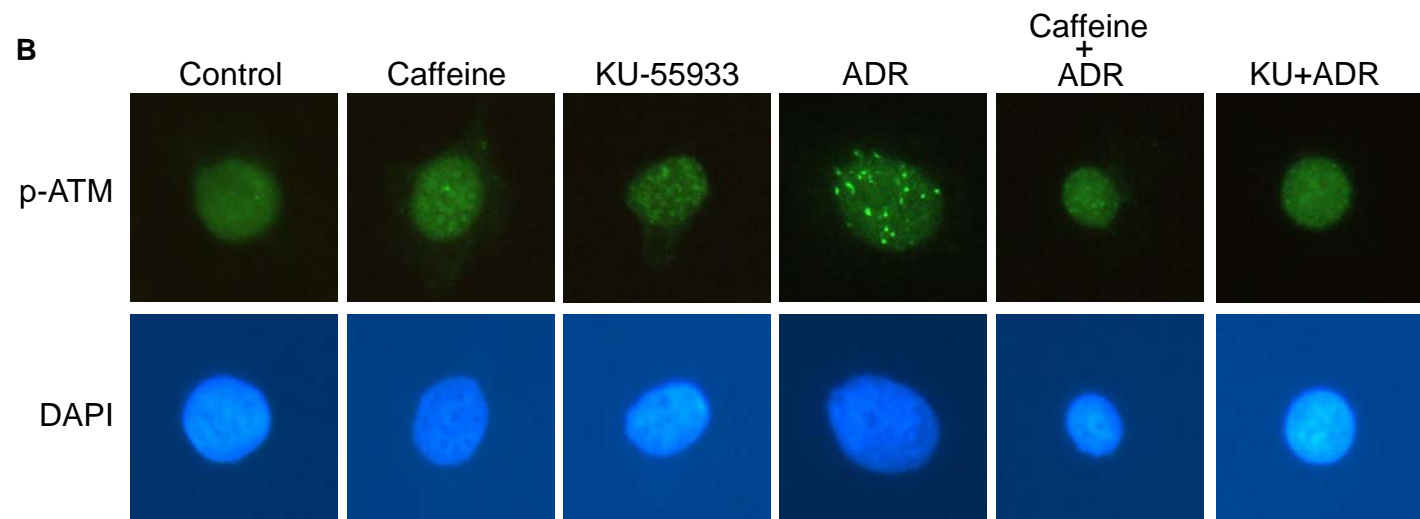

**A**

**HCT-116**

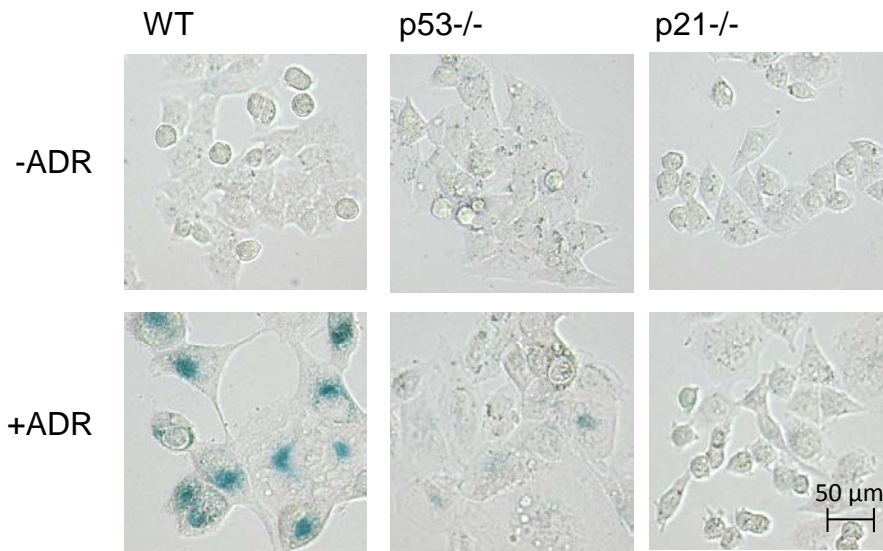

**B**

**HCT-116**

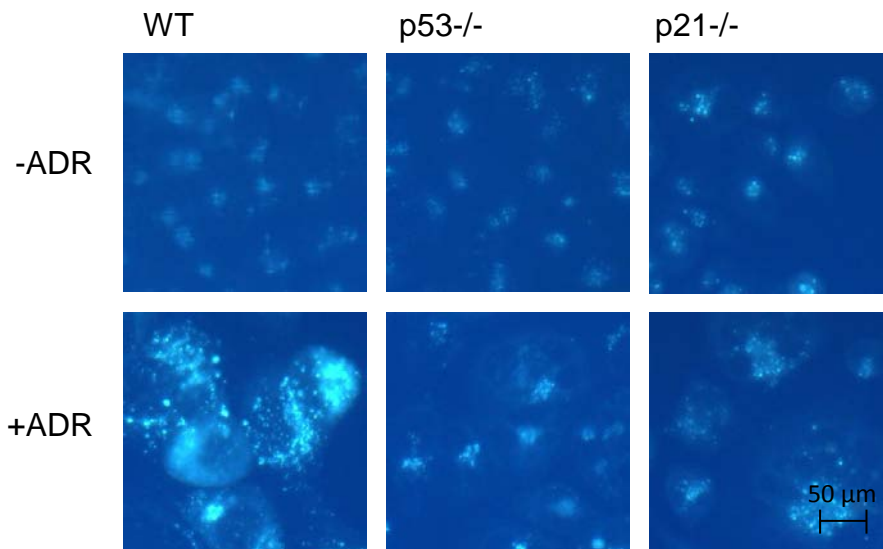

**JPET 197590 Goehe et al. The autophagy-senescence connection in chemotherapy; must tumor cells (self) eat before they sleep? Supplementary Figure 3**

C

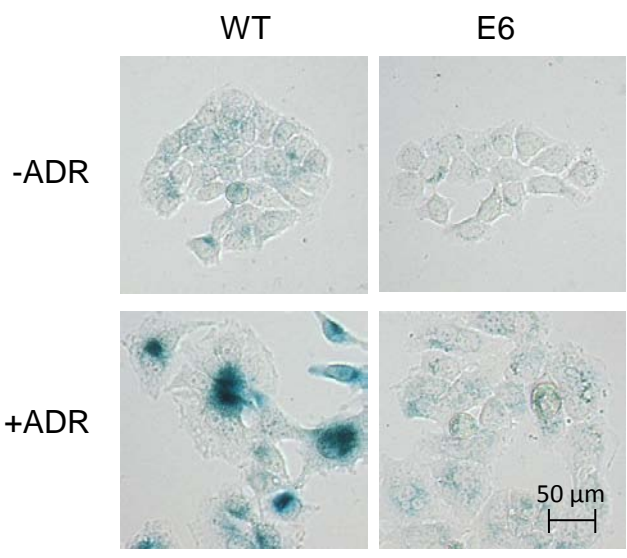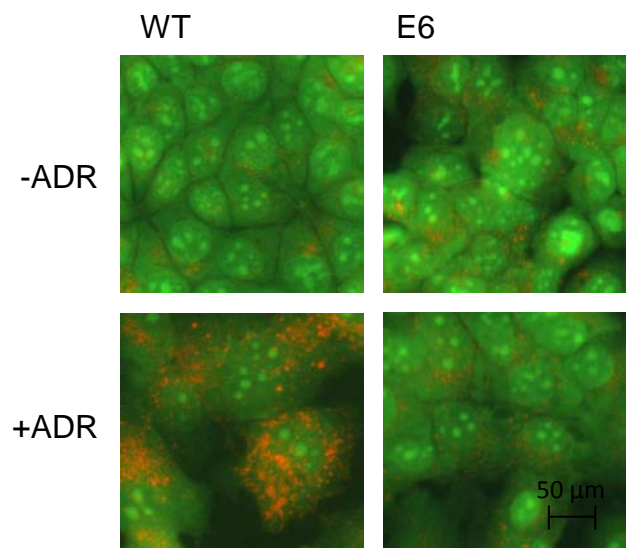

**JPET 197590 Goehe et al. The autophagy-senescence connection in chemotherapy; must tumor cells (self) eat before they sleep? Supplementary Figure 3**

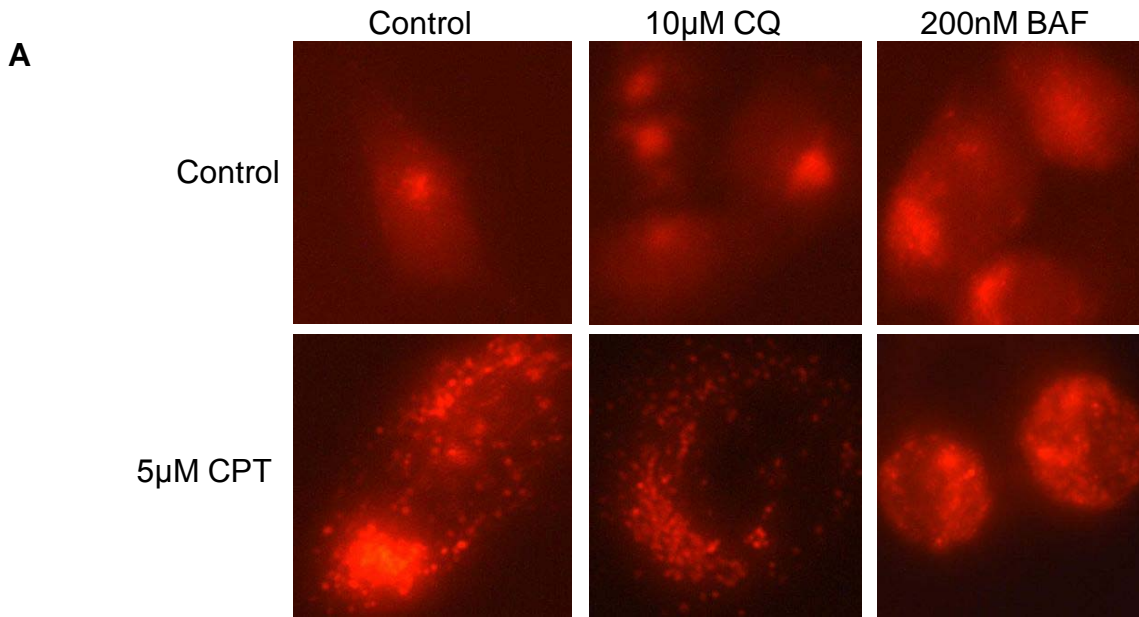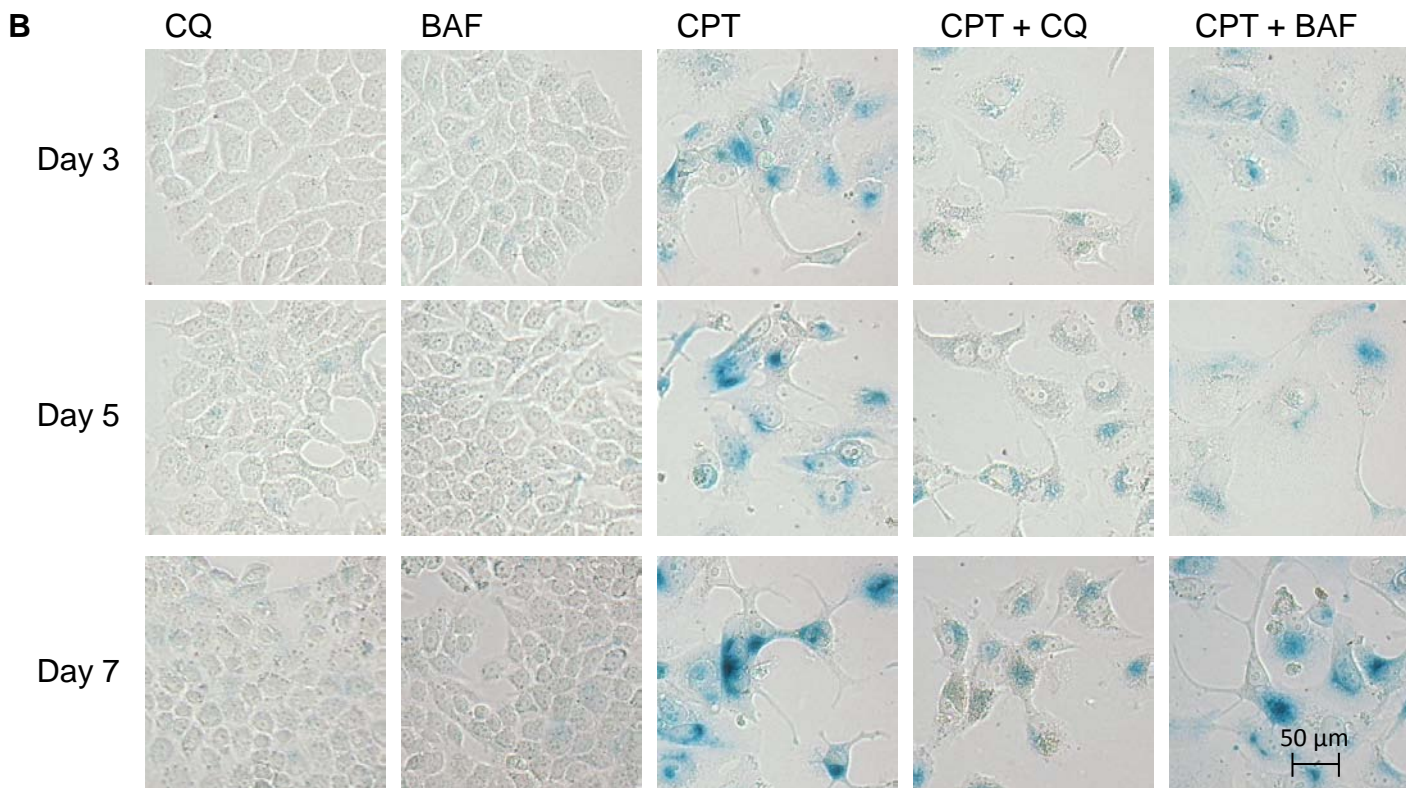

**JPET 197590 Goehe et al. The autophagy-senescence connection in chemotherapy; must tumor cells (self) eat before they sleep? Supplementary Figure 4**

⚡ Genotoxic Stress (e.g. Adriamycin, Camptothecin) ⚡

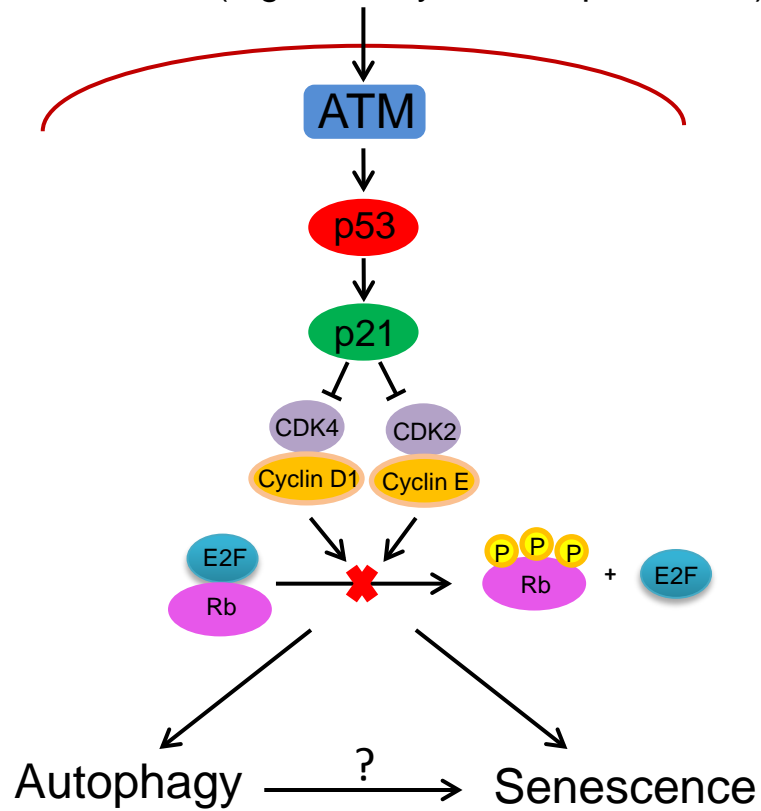

**JPET 197590 Goehe et al. The autophagy-senescence connection in chemotherapy; must tumor cells (self) eat before they sleep? Supplementary Figure 5**
